# Supplementary material for: The cancer-associated cell migration protein TSPAN1 is under control of androgens and its upregulation increases prostate cancer cell migration
Source: PubMed Central journal article supplement (PMC5507901; doi:10.1038/s41598-017-05489-5), 2017-07-12
Supplement: 41598_2017_5489_MOESM1_ESM.pdf [file 41598_2017_5489_MOESM1_ESM.pdf]

# **The cancer-associated cell migration protein TSPAN1 is under direct control of androgens and its upregulation increases prostate cancer cell migration**

Jennifer Munkley<sup>1\*</sup>, Urszula L. McClurg<sup>2</sup>, Karen E. Livermore<sup>1</sup>, Ingrid Ehrmann<sup>1</sup>, Bridget Knight<sup>3</sup>, Paul Mccullagh<sup>4</sup>, John Mcgrath<sup>5</sup>, Malcolm Crundwell<sup>6</sup>, Lorna W. Harries<sup>7</sup>, Hing Y. Leung<sup>8,9</sup>, Ian G. Mills<sup>10,11,12</sup>, Craig N. Robson<sup>2</sup>, Prabhakar Rajan<sup>13</sup> & David J. Elliott<sup>1</sup>

## **Supplementary Information:**

## **Supplementary Data**

**Supplementary Figure 1:** Androgen Receptor ChIP-Seq peaks in LNCaP and VCaP cells identified by Massie et al. 2011.

**Supplementary Figure 2:** TSPAN1 antibody validation.

**Supplementary Figure 3:** (A) Overall survival and relapse free survival for patients with either low or high TSPAN1. (B) TSPAN1 histoscores correlation with prostate cancer patient clinical parameters: i) PSA levels at patient relapse, ii) hormone sensitive or castrate resistant disease.

**Supplementary Figure 4:** Relative endogenous TSPAN1 levels in prostate cancer cell lines

**Supplementary Figure 5:** Analysis of cell proliferation and cell adhesion in DU145 cells stably transfected with TSPAN1.

**Supplementary Table 1:** Meta-analysis of TSPAN1 expression in prostate cancer tissue.

**Supplementary Table 2:** Basic clinical data for patient tissue samples used in TMA

**Supplementary Table 3:** Real-time PCR analysis of 77 cell motility genes in DU145 cells stably transfected with TSPAN1.

**Supplementary Table 4:** Differential analysis of gene expression in neuroendocrine prostate cancer (data produced by Beltran et al. 2016 44).

**Supplementary Table 5:** Real-time PCR primer sequences used.

**Supplementary Table 6:** Concentrations of antibodies used.

Full length western blots are also included for supplementary information

## Supplementary Figure 1

Androgen Receptor ChIP-Seq peaks in LNCaP and VCaP cells identified by Massie et al. 2011

### LNCaP cells

AR ChIP-Seq peaks ■

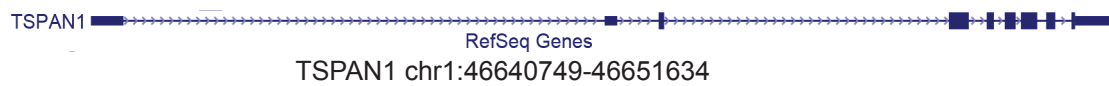

### VCaP cells

AR ChIP-Seq peaks ■

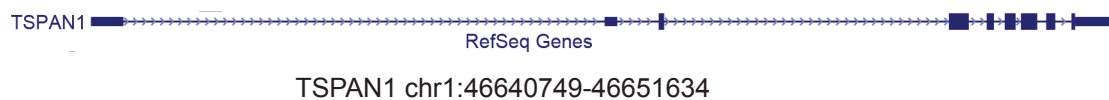

### Predicted AR binding sites:

LNCaP cells: chr1:46640495-46640802

VCaP cells: chr1:46640361-46640945

## Supplementary Figure 2

### TSPAN1 antibody validation

**A**

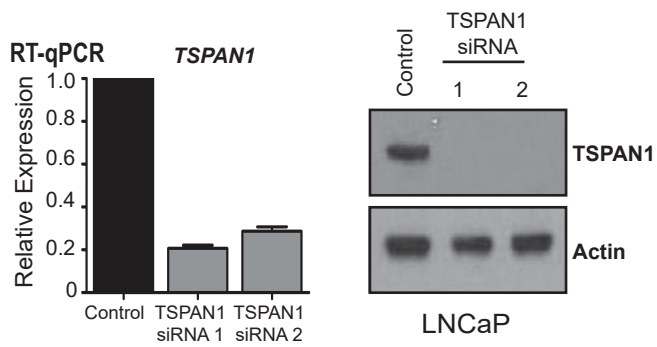

(duplicated from Figure 3A)

**B**

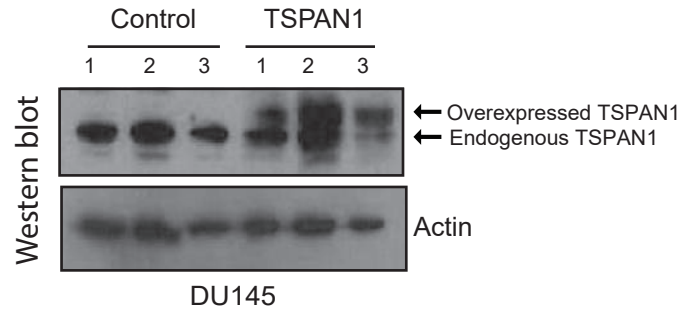

**C**

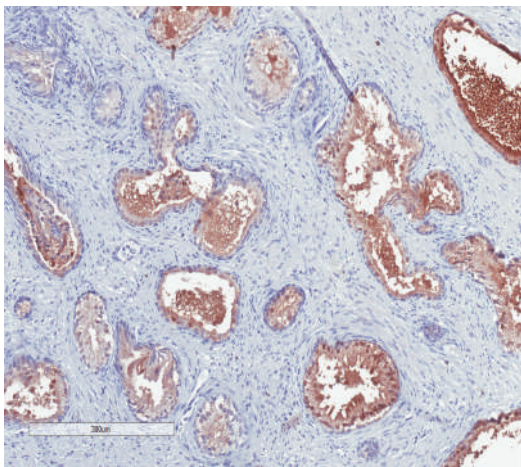

Prostate cancer tissue stained with TSPAN1 antibody at 1:1500

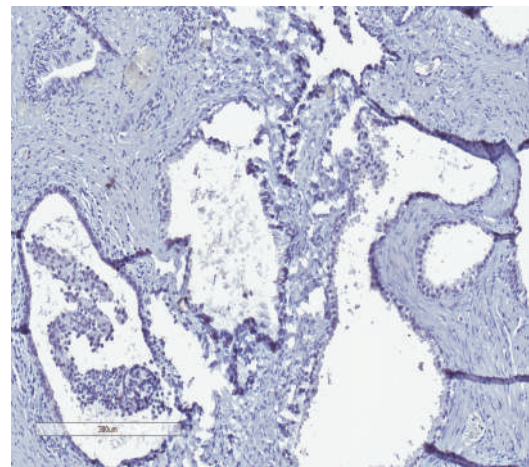

Prostate cancer tissue stained with TSPAN1 antibody at 1:1500 following pre-incubation with TSPAN1 immunising peptide

**D**

Control siRNA

TSPAN1 siRNA

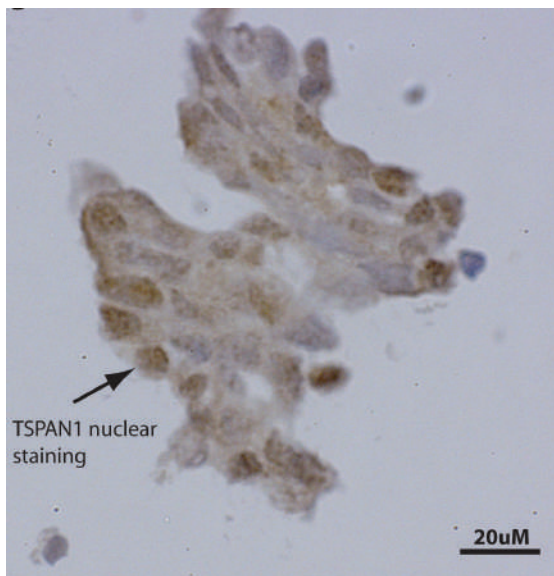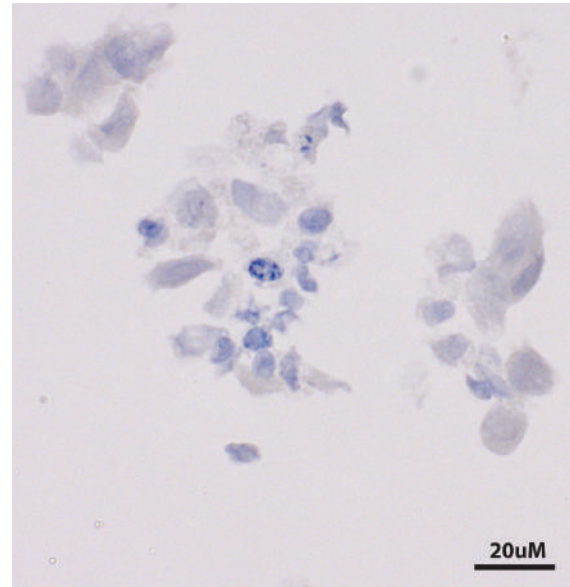

Detection of siRNA mediated depletion of TSPAN1 in FFEP LNCaP cell pellets stained with TSPAN1 antibody

### Supplementary Figure 3A

Overall survival and relapse free survival for patients with either low or high TSPAN1

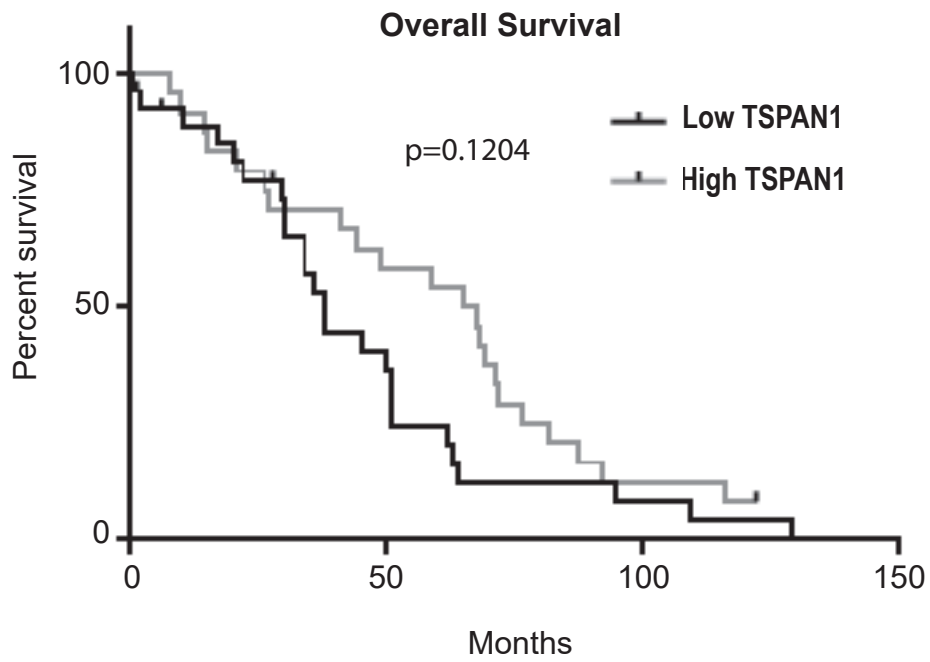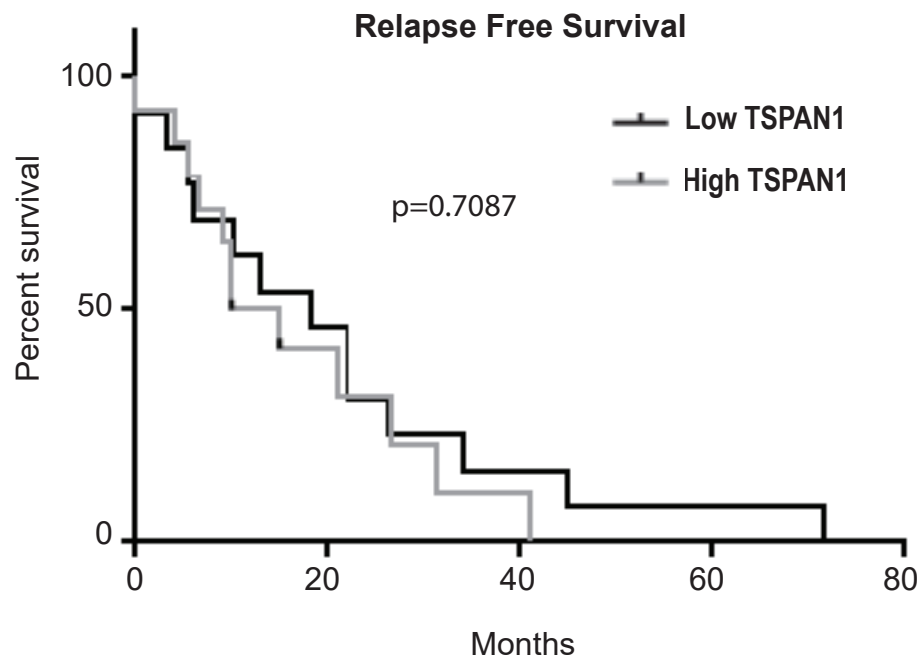

## Supplementary Figure 3B

TSPAN1 histoscores correlation with prostate cancer patient clinical parameters

i)

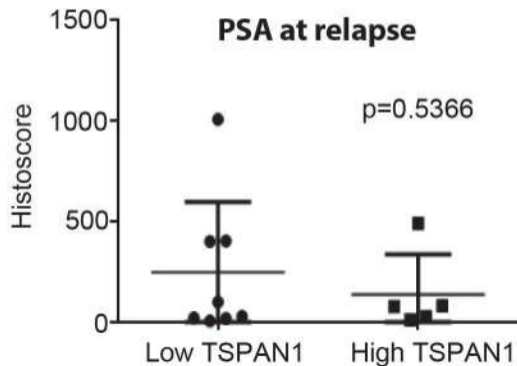

ii)

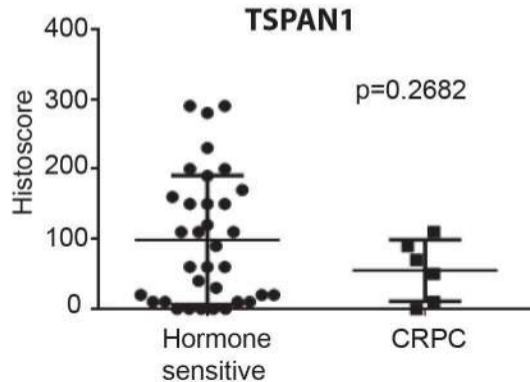

## Supplementary Figure 4

Relative TSPAN1 expression levels in different prostate cancer cell lines

**A**

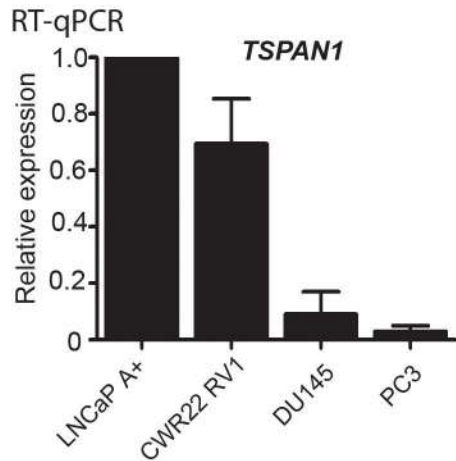

**B**

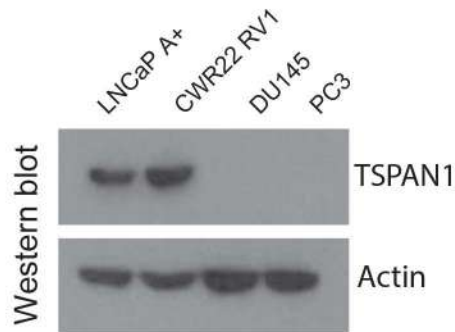

## Supplementary Figure 5

Analysis of cell proliferation and cell adhesion in DU145 cells stably transfected with TSPAN1

### A. Cell Proliferation Assay

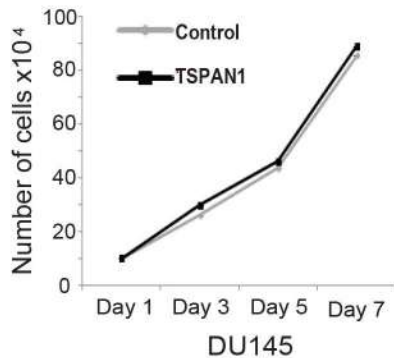

### B. Cell Adhesion Assay

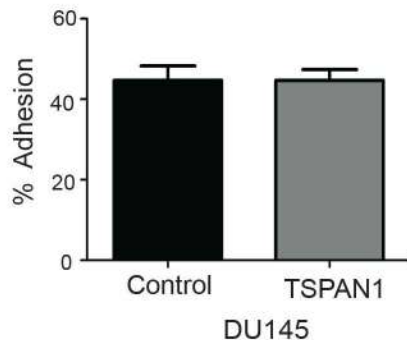



## Munkley et al. Full western blot images

The cancer-associated cell migration protein TSPAN1 is under direct control of androgens and its upregulation increases prostate cancer cell migration

### Figure 1D

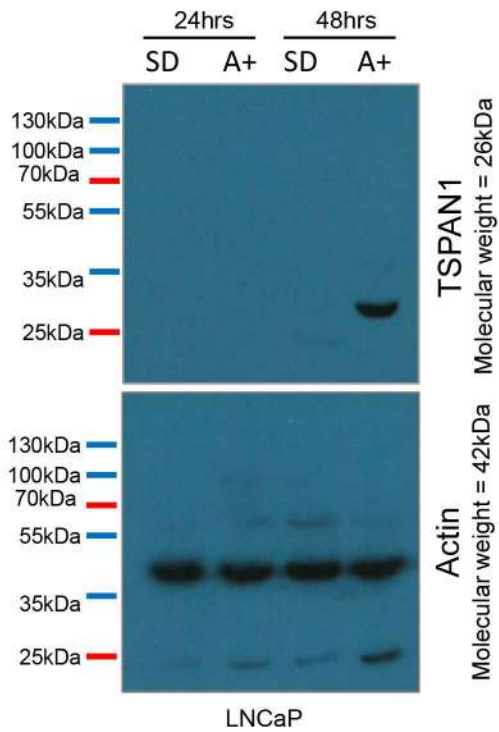

### Figure 1E

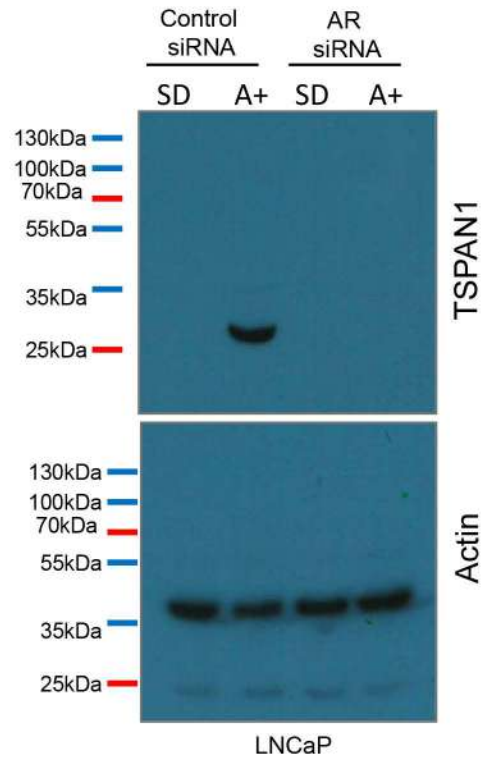

### Figure 1F

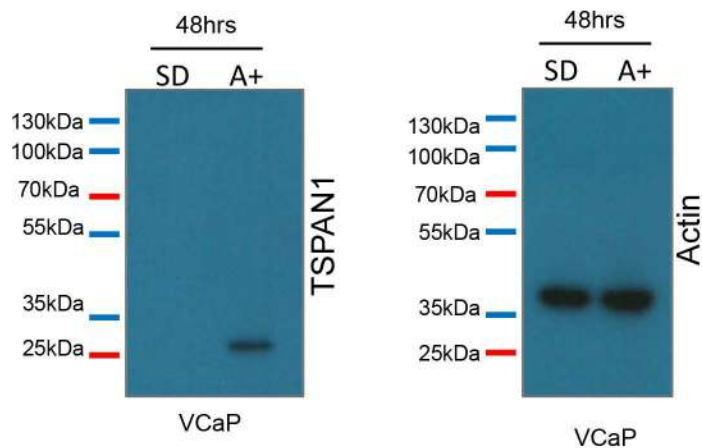

**Figure 3C**

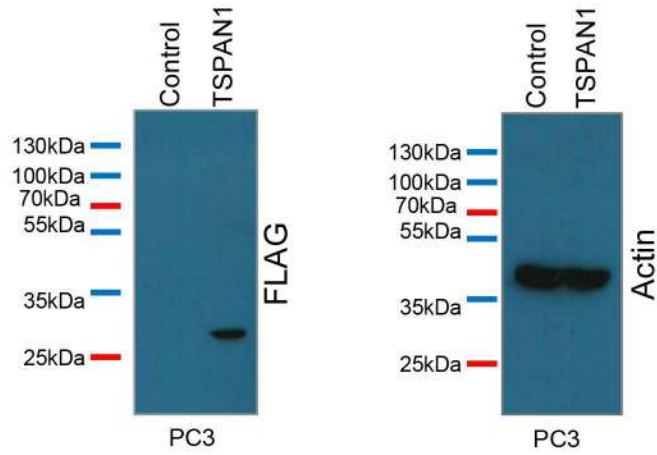

**Figure 3E**

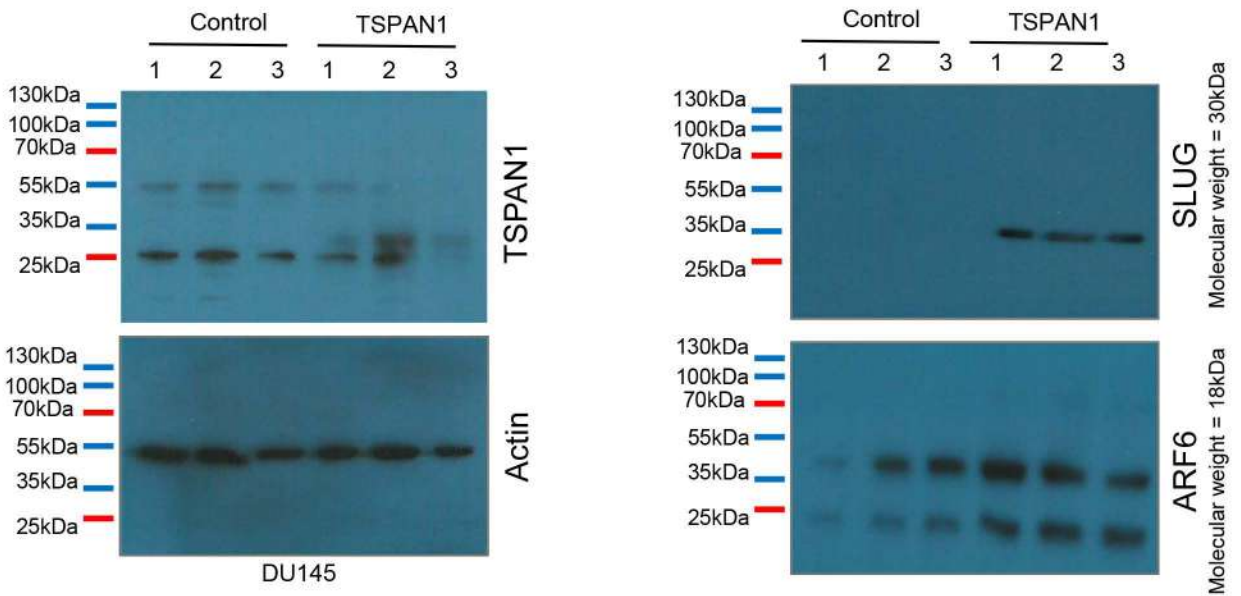

**Figure 4A**

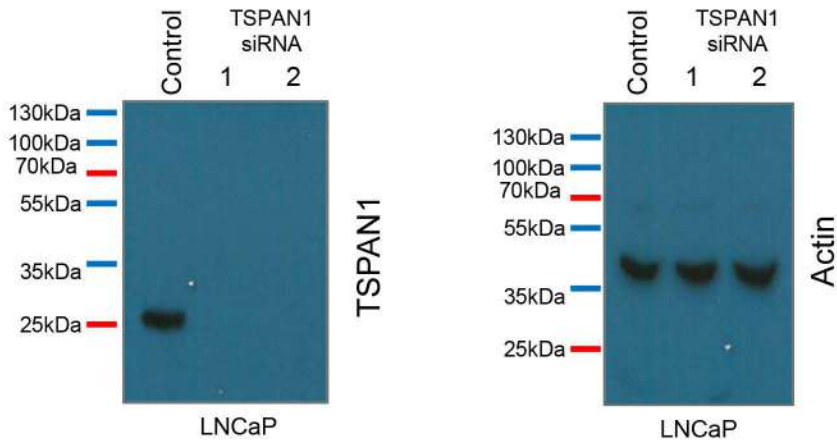

**Figure 4C**

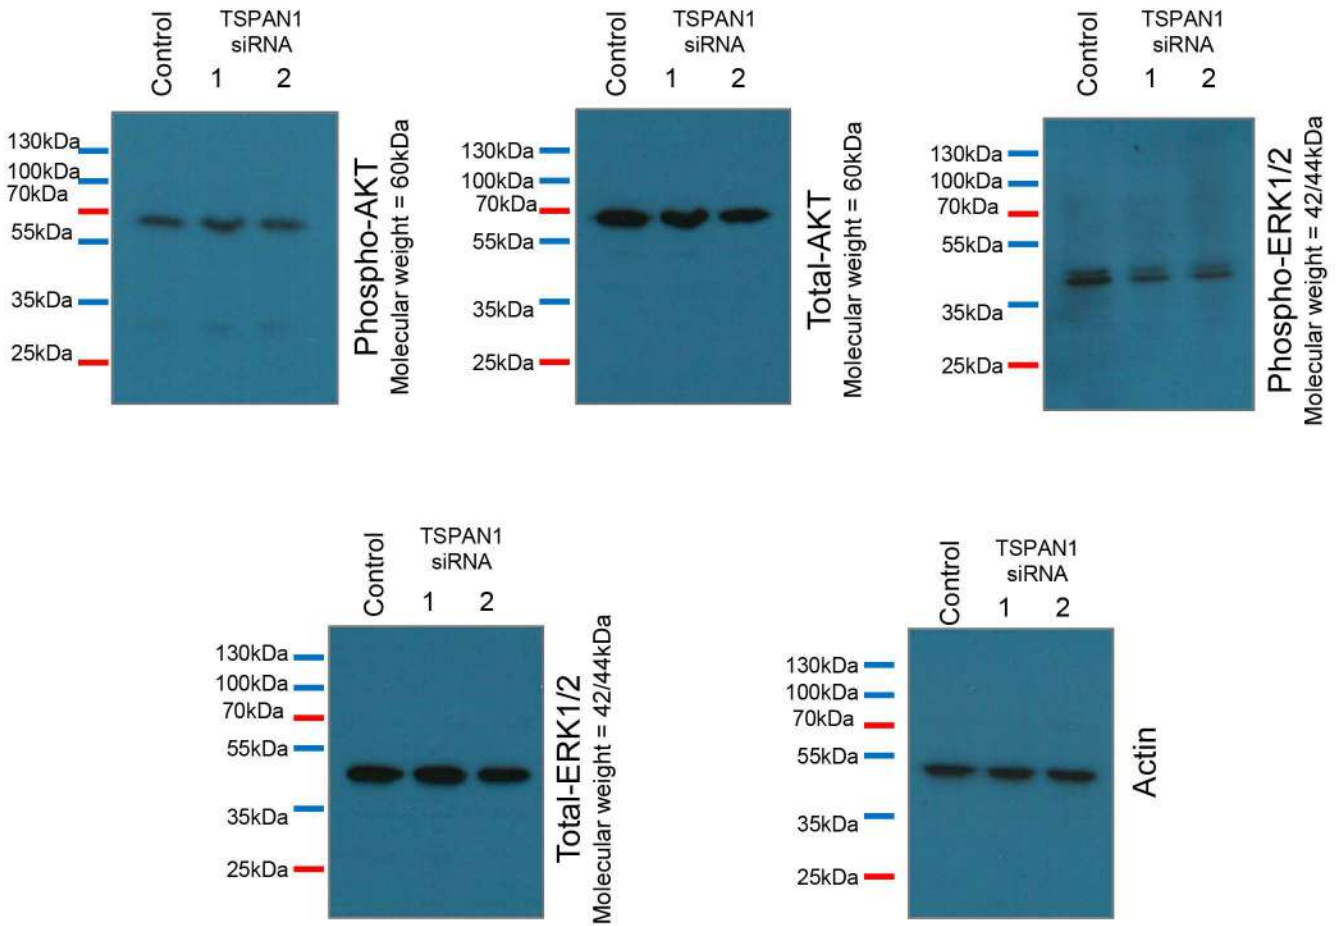

**Supplementary Table 1: Meta-analysis of *TSPAN1* expression in prostate cancer**

1012 samples

|                    |                                            |                                            |                                            |
|--------------------|--------------------------------------------|--------------------------------------------|--------------------------------------------|
|                    | <b>Grasso et al. 2012</b>                  | <b>Taylor et al. 2010</b>                  | <b>Singh et al. 2002</b>                   |
|                    | Prostate carcinoma v normal<br>122 samples | Prostate carcinoma v normal<br>185 samples | Prostate carcinoma v normal<br>102 samples |
| <b>Fold Change</b> | <b>2.214</b>                               | <b>1.844</b>                               | <b>8.438</b>                               |
| <b>p value</b>     | 1.31E-06                                   | 1.72E-07                                   | 3.98E-08                                   |
|                    | <b>Yu et al. 2004</b>                      | <b>Vanaja et al. 2003</b>                  | <b>LaTulippe et al. 2002</b>               |
|                    | 112 samples<br>Prostate carcinoma v normal | 40 samples<br>Prostate carcinoma v normal  | 35 samples<br>Prostate carcinoma v normal  |
| <b>Fold Change</b> | <b>2.322</b>                               | <b>2.213</b>                               | 7.751                                      |
| <b>p value</b>     | 2.55E-05                                   | 4.64E-05                                   | 0.123                                      |
|                    | <b>Wallace et al. 2008</b>                 | <b>Arredouani et al. 2009</b>              | <b>LaPointe et al. 2004</b>                |
|                    | Prostate carcinoma v normal<br>89 samples  | Prostate carcinoma v normal<br>21 samples  | Prostate carcinoma v normal<br>112 samples |
| <b>Fold Change</b> | <b>2.276</b>                               | <b>1.612</b>                               | <b>1.59</b>                                |
| <b>p value</b>     | 2.00E-03                                   | 0.049                                      | 4.19E-04                                   |
|                    | <b>Luo et al. 2002</b>                     | <b>Holzbeierlein et al. 2004</b>           | <b>Welsh et al. 2001</b>                   |
|                    | Prostate carcinoma v normal<br>30 samples  | Prostate carcinoma v normal<br>54 samples  | Prostate carcinoma v normal<br>34 samples  |
| <b>Fold Change</b> | 1.41                                       | 1.366                                      | <b>3.971</b>                               |
| <b>p value</b>     | 1.15E-01                                   | 2E-01                                      | 4.33E-05                                   |
|                    | <b>Varambally et al. 2005</b>              | <b>Liu et al. 2006</b>                     |                                            |
|                    | 19 samples<br>Prostate carcinoma v normal  | Prostate carcinoma v normal<br>57 samples  |                                            |
| <b>Fold Change</b> | <b>2.303</b>                               | <b>1.574</b>                               |                                            |
| <b>p value</b>     | 0.007                                      | 8.87E-04                                   |                                            |

TSPAN1 significantly upregulated in 11/14 datasets

**Supplementary Table 2: Basic clinical data for patient tissue samples used in TMA.**

Samples used in this study were collected between January 1989 and June 2003 from the Freeman Hospital patients. All samples were first analysed by a trained pathologist before selection of cores for TMA construction was performed.

|                     |              |               |               |               |              |                |             |            |
|---------------------|--------------|---------------|---------------|---------------|--------------|----------------|-------------|------------|
| Gleason             | 4 n=1        | 5 n=1         | 6 n=5         | 7 n=11        | 8 n=17       | 9 n=24         | 10 n=7      | uk<br>n=11 |
| Age at<br>diagnosis | 40-49<br>n=1 | 50-59<br>n=5  | 60-69<br>n=12 | 70-79<br>n=28 | 80-89<br>n=4 |                |             | uk<br>n=26 |
| Stage               | T1 n=16      | T1B n=7       | T2 n=11       | T3 n=24       | T3C n=3      | T4 n=11        | T4B n=1     | uk n=4     |
| PSA                 | <10 n=8      | 10-19<br>n=11 | 20-29<br>n=4  | 30-49<br>n=10 | 50-99<br>n=6 | 100-200<br>n=4 | <200<br>n=4 | Uk<br>n=30 |

**Supplementary Table 3: Real-time PCR screen for 72 cell motility genes in DU145 TSPAN1 stable cell line**

**10 genes with significant changes:**

|                   |             |           |                                 |              |           |
|-------------------|-------------|-----------|---------------------------------|--------------|-----------|
| <b>TSPAN1</b>     | <b>RQ</b>   | <b>SE</b> | <b>actn3</b>                    | <b>RQ</b>    | <b>SE</b> |
| Control           | 1.00        | 0.00      | control                         | 1.00         |           |
| TSPAN1            | <b>6.62</b> | 2.16      | TSPAN1                          | <b>0.65</b>  | 0.11      |
| <b>rac2</b>       | <b>RQ</b>   | <b>SE</b> | <b>cav1</b>                     | <b>RQ</b>    | <b>SE</b> |
| Control           | 1           |           | Control                         | 1.000        |           |
| TSPAN1            | <b>2.01</b> | 0.19      | TSPAN1                          | <b>0.500</b> | 0.05      |
| <b>actn1</b>      | <b>RQ</b>   | <b>SE</b> | <b>ptk2b</b>                    | <b>RQ</b>    | <b>SE</b> |
| control           | 1.00        |           | Control                         | 1.000        |           |
| TSPAN1            | <b>1.95</b> | 0.20      | TSPAN1                          | <b>0.510</b> | 0.03      |
| <b>ARF6</b>       | <b>RQ</b>   | <b>SE</b> | <b>pxn</b>                      | <b>RQ</b>    | <b>SE</b> |
| control           | 1.00        |           | Control                         | 1            |           |
| TSPAN1            | <b>2.04</b> | 0.39      | TSPAN1                          | <b>0.36</b>  | 0.030     |
| <b>DIAPH1</b>     | <b>RQ</b>   | <b>SE</b> | <b>67 genes with no change:</b> |              |           |
| control           | 1.00        |           | wasf2                           | capn1        | stat3     |
| TSPAN1            | <b>2.28</b> | 0.27      | fgf2                            | msn          | baiap2    |
| <b>ICAM1</b>      | <b>RQ</b>   | <b>SE</b> | vegfa                           | myl9         | plcg1     |
| control           | 1.00        |           | pld1                            | rock1        | svil      |
| TSPAN1            | <b>2.00</b> | 0.28      | myh9                            | ptk2         | rnd3      |
| <b>SNAI2/Slug</b> | <b>RQ</b>   | <b>SE</b> | itgb1                           | tln1         | rdx       |
| control           | 1.00        |           | wipf1                           | ezr          | crk       |
| TSPAN1            | <b>3.27</b> | 0.40      | mapk1                           | vasp         | rac1      |
|                   |             |           | igfr1                           | pak4         | limk1     |
|                   |             |           | egfr                            | pfn1         | pak1      |
|                   |             |           | met                             | tmp2         | twist2    |
|                   |             |           | plaur                           | arhgdia      | snai1     |
|                   |             |           | itgb3                           | ptpn1        | vim       |
|                   |             |           | itgb2                           | akt1         | cdh1      |
|                   |             |           | rac2                            | actn4        | cdh2      |
|                   |             |           | prkca                           | actr2        |           |
|                   |             |           | capn2                           | wasf1        |           |
|                   |             |           | mmp14                           | fap          |           |
|                   |             |           | ptk2                            | cfl1         |           |
|                   |             |           | pten                            | pik3ca       |           |
|                   |             |           | csf1                            | actr3        |           |
|                   |             |           | enah                            | sh3pxd2a     |           |
|                   |             |           | ilk                             | cttn         |           |
|                   |             |           | vcl                             | mylk         |           |
|                   |             |           | rasa1                           | cdc42        |           |
|                   |             |           | bcar1                           | egf          |           |

**Supplementary Table 4: Differential analysis of somatic copy number and gene expression in neuroendocrine prostate cancer**

Beltran et al. 2016

|        | <b>% CRPC-NE deletion</b> | <b>% CRPC-Adeno deletion</b> |
|--------|---------------------------|------------------------------|
| TSPAN1 | 0.023255814               | 0.037735849                  |
| ARF6   | 0.093023256               | 0                            |
| SLUG   | 0.069767442               | 0                            |

|        | <b>% CRPC-NE amplification</b> | <b>% CRPC-Adeno amplification</b> |
|--------|--------------------------------|-----------------------------------|
| TSPAN1 | 0.279069767                    | 0.283018868                       |
| ARF6   | 0.325581395                    | 0.377358491                       |
| SLUG   | 0.372093023                    | 0.58490566                        |

**Supplementary Table 5: Real-time PCR primer sequences**

|                   | <b>Forward</b>            | <b>Reverse</b>                  |
|-------------------|---------------------------|---------------------------------|
| <b>TSPAN1</b>     | GAAAGGGCTCAAGTGCTGTG      | TCATTGGCTGTGTTGGTGAC            |
| <b>rac2</b>       | GTTCCCCTTCCGTTTCCTC       | ATCTCCCACCACCACACACT            |
| <b>actn1</b>      | GCTCCTGTGGTGTGTCAGAGAA    | GCTTCCCGTAGTCAATCAGC            |
| <b>ARF6</b>       | CGCCATAATCCTCATCTTCG      | TCATAGAGTCCGTCCCCTGA            |
| <b>DIAPH1</b>     | AGTCCCTTCGTGTGTCTCTCA     | GGCTATCGTAACTCCCAGCA            |
| <b>ICAM1</b>      | CACTCTGGCTCCTTCACCAT      | AACCACTGACTCCCCCTTCCT           |
| <b>SNAI2/Slug</b> | TGTCATACCACAACCAGAGA      | CTTGGAGGAGGTGTCAGAT             |
| <b>actn3</b>      | CAGAGGAAGACAGCACCGTA      | CTTTCGCAGTTTGGCGTAGT            |
| <b>cav1</b>       | ACTGGTTTTACCGCTTGCTG      | GGAATAGACACGGCTGATGC            |
| <b>ptk2b</b>      | ATCATCACCTCCATCCTGCT      | TCATACCTCCACTCGGCTTC            |
| <b>pxn</b>        | GGCTCTCTCATCATCCATCC      | TTCAGGACCACATCTTCAGC            |
| <b>Actin</b>      | CATCGAGCACGGCATCGTCA      | TAGCACAGCCTGGATAGCAAC           |
| <b>GAPDH</b>      | AAC AGC GAC ACC CAT CCT C | CAT ACC AGG AAA TGA GCT TGA CAA |
| <b>Btubulin</b>   | CTTCGGCCAGATCTTCAGAC      | AGAGAGTGGGTCAGCTGGAA            |



**Supplementary Table 6: Concentration of antibodies used**

| <b>Antibody</b>   | <b>Supplier</b> | <b>Product number</b> | <b>Concentration for WB</b> | <b>Concentration for IHC</b> |
|-------------------|-----------------|-----------------------|-----------------------------|------------------------------|
| TSPAN1            | Sigma-Aldrich   | HPA011909             | 1 to 2000                   | 1 to 1500                    |
| AR                | Bioscience      | 554226                | 0.5 µg/ml                   |                              |
| p21 Waf1/Cip1     | Cell Signaling  | 2947                  | 1 to 1000                   |                              |
| Slug              | Cell Signaling  | 9585                  | 1 to 1000                   |                              |
| p44/42 MAPK       | Cell Signaling  | 9106                  | 1 to 250                    |                              |
| Total ERK2        | Santa Cruz      | sc-1647               | 0.2 µg/ml                   |                              |
| pAKT              | Sigma-Aldrich   | SAB4300042            | 1 to 1000                   |                              |
| Total AKT         | Santa Cruz      | sc-8312               | 0.2 µg/ml                   |                              |
| ARF6              | Cell Signaling  | 5740                  | 1 to 1000                   |                              |
| Flag              | Sigma-Aldrich   | F3165                 | 1 to 2000                   |                              |
| Actin             | Sigma-Aldrich   | A2668                 | 1 to 2000                   |                              |
| normal rabbit IgG | Jackson labs    | 711-035-152           | 1 to 2000                   |                              |
| normal mouse IgG  | Jackson labs    | 715-036-150           | 1 to 2000                   |                              |
